# Supplementary material for: Overexpression of Foxc1 ameliorates sepsis-associated encephalopathy by inhibiting microglial migration and neuroinflammation through the IκBα/NF-κB pathway
Source: PubMed Central journal article supplement — Mol Med Rep. 2022 Jan 31;25(3):107. doi: 10.3892/mmr.2022.12623 (PMC8822881; doi:10.3892/mmr.2022.12623), 2022-01-31

Figure S1. Assessment of spatial learning and memory with Morris Water Maze test before CLP surgery. (A) Swimming speed throughout the 6 consecutive days among the four treatment groups. (B) Latency, defined as the time taken to find the hidden platform. The platform was removed on day 6, where the latency becomes the time taken to enter the platform area. (C) After the removal of platform, the number of times each mouse spent in the quadrant platform area in 60 sec was documented. (D) The number of times each mouse passing through target platform. Data are expressed as the mean  $\pm$  SD (n=14/group). CLP, cecal ligation and perforation; Foxc1, Forkhead box C; OE, overexpression.

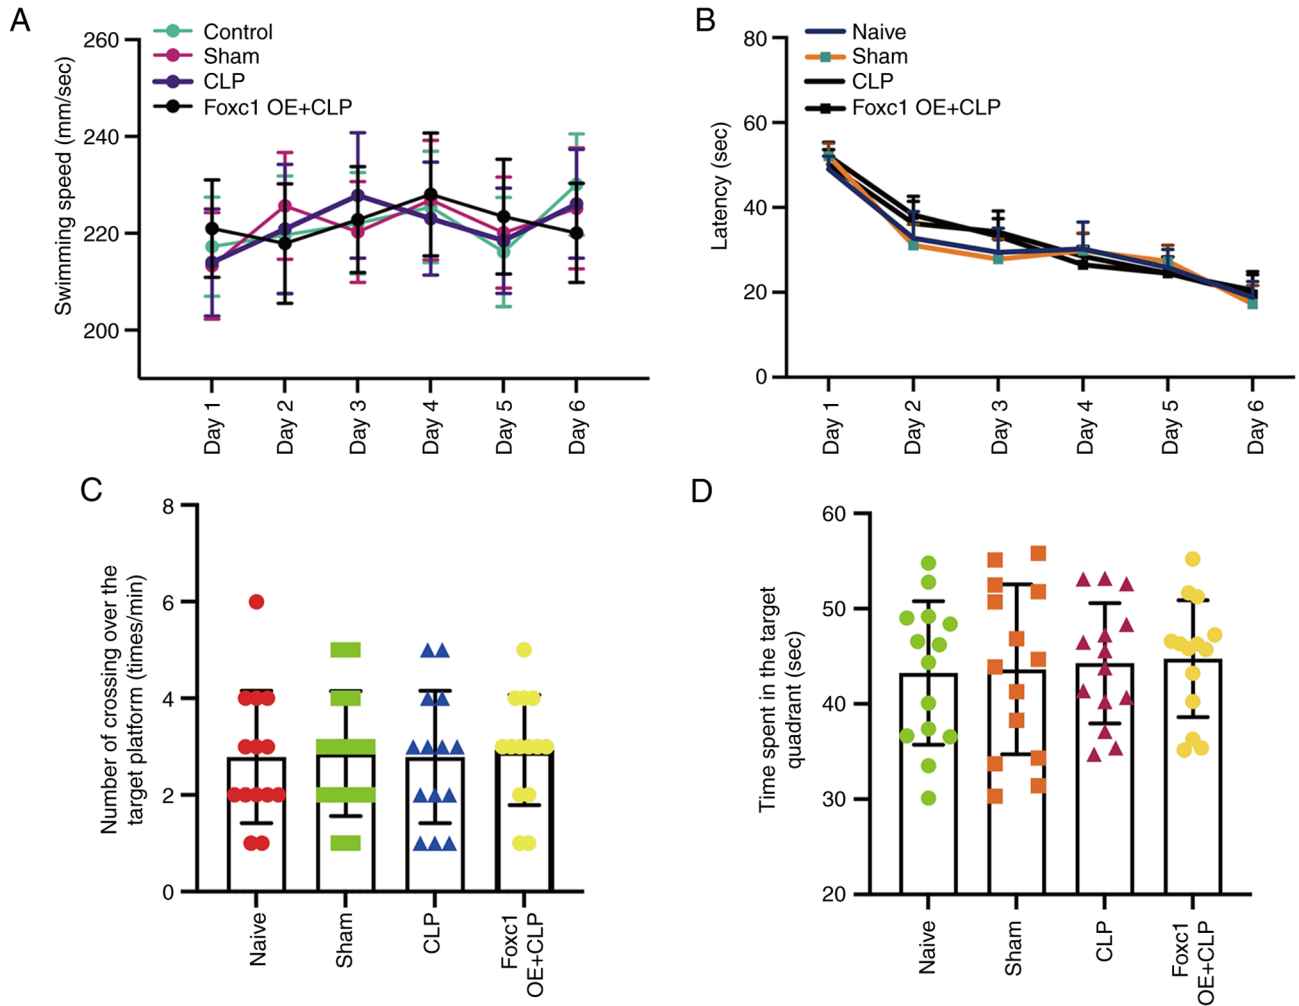

Supplement: Supplementary_Data.pdf [file Supplementary_Data.pdf]
